# Supplementary material
Source: PubMed Central journal article supplement (PMC7899034)
Supplement: NIHMS1669367-supplement-Supplement_1.pdf [file NIHMS1669367-supplement-Supplement_1.pdf]

## Appendix

### Appendix A: Diagram of Contract Consolidation

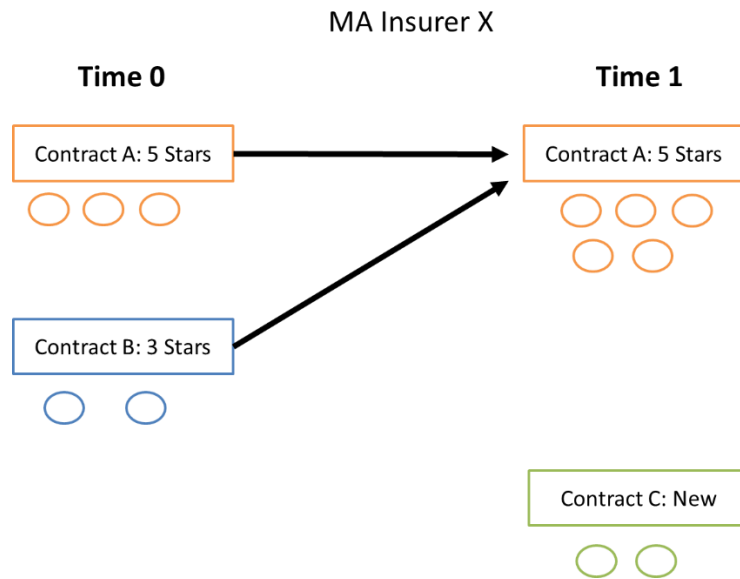

Notes: This figure represents how consolidation can work for a single MA insurer, entitled here as X. This insurer in time 0 has two contracts, one rated 5 stars, and the other rated 3 stars. Between one year (time 0), and the following (time 1), the insurer can consolidate contract B into contract A. All of the enrollees in contract B are moved into contract A for the following year. Under the quality improvement program, the insurer would now be eligible for bonus payments on all enrollees in contract A. To continue this process, the insurer can also start a new contract, contract C, in the following year. In the first several years before the new contract is rated, it will also receive bonus payments.

Appendix B: Diagram of Study Design

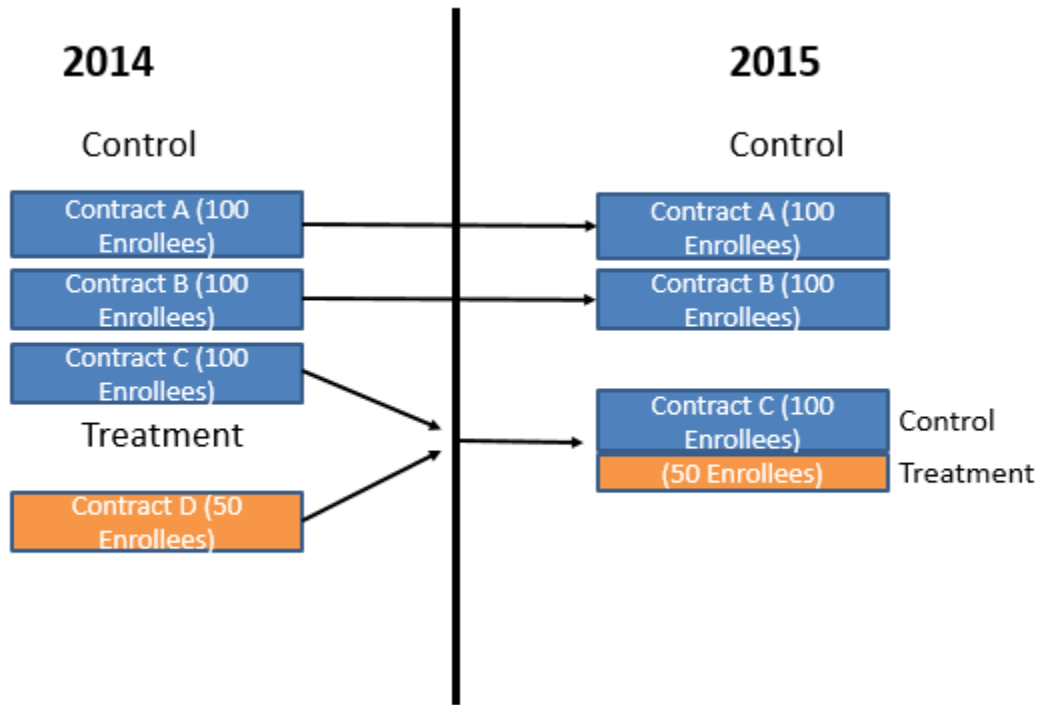

Notes: This diagram provides a stylized depiction of our study design. In 2014 there are contracts that are not involved in consolidation (A, B). These contracts can be either high or low rated. There is also contract C which serves as a destination contract for a consolidation. Between 2014 and 2015, contract D is consolidated into contract C. The enrollees who were in contract D, and are now in contract C, serve as the primary treatment group. Enrollees who were already in contract C prior to the consolidation still remain in the treatment group. To control for the characteristics of enrollee’s initial contracts, we include 2014 contract fixed effects in our models.

## Appendix C: Detailed Description of the Analysis

In this study, our primary question of interest is whether there is an effect of being enrolled in a higher rated plan on enrollee outcomes. This can be represented by the following model:

$$y_{itc} = \alpha + \beta_1 Stars_{itc} + \beta_2 Year_t + X_i + \delta_{c2014} + \varepsilon$$

Where  $y_{it}$  represents the outcome for enrollee  $i$  at time  $t$ . The explanatory variable of interest is  $\beta_1 Stars_{itc}$  which is the star rating for an enrollee's contract,  $c$ , at time  $t$ .  $\beta_2 Year_t$  is a flag for year. We also include  $X_i$ , a vector of patient covariates, and  $\delta_{c2014}$  which is a fixed effect for the 2014 contract.  $\varepsilon$  is the error term. The problem with this approach is that there is likely selection bias or unmeasured confounding of the relationship between the plan's star rating and enrollee outcomes. For example, prior literature have found the enrollees who differ in key characteristics from each other enroll in,<sup>4</sup> and disenroll from<sup>9</sup> high and low quality contracts at different rates. Further, star ratings have been found to be closely linked to the socioeconomic status of enrollees.<sup>12</sup> Given the potential for confounding, we are unable to directly compare the relationship between star ratings and outcomes.

One method of addressing this concern is through the use of an instrumental variable.<sup>24</sup>

In instrumental variable analyses, an additional variable, the instrument, is used in order to isolate the relationship between the explanatory variable of interest and the outcome.<sup>25,26</sup> For an instrument to be valid for this purpose, it needs to have a relationship with the explanatory variable of interest, and it needs to be plausibly exogenous from the outcome of interest.

Instruments have been rising in prominence in the health services research literature.<sup>27,28</sup>

We use Medicare Advantage contract consolidation as an instrument.<sup>17</sup> Since 2012, MA insurers have consolidated contracts, moving all enrollees from a lower rated plan to a higher rated one.

When consolidation occurs, enrollees are informed of the change, however they are moved automatically without needing to opt into the change. As a result, enrollees are in one year enrolled in a lower rated plan, and the following year are enrolled in a higher rated plan, independent of their own selection choice. Some enrollees may disenroll from MA, or switch contracts independently, however most are moved to the higher rated plan.

We use this consolidation as a natural experiment to measure the relationship between star ratings and outcomes. We do this through the use of consolidation as an instrumental variable. While consolidation as an instrument is likely to reduce the role of enrollee selection bias in estimating the impact of plan quality, there may still be differences between the contracts that are consolidated and those that are not. To address this, we use multiple years of data, enabling us to compare outcomes between enrollees in the same contracts over time.

We constructed a dataset for all Medicare Advantage beneficiaries in 2014 and 2015. We merged HEDIS outcomes to each beneficiary in each year, and calculated other disenrollment and network quality outcomes in each year. For this analysis, we focused on consolidation between 2014 and 2015. We assign a 0/1 flag to all beneficiaries who were in a contract that consolidated, regardless of whether they enrolled in the new contract (an enrollee might be in a consolidated plan, but they might disenroll or switch contracts independently). We also create a variable for the enrollee's 2014 contract, that we assign to them in both 2014 and 2015 for use as a fixed effect. This allows us to set up a pre-post analysis, comparing enrollees in the same contracts who were consolidated against those who were not.

Our first stage can be represented by the equation:

$$Stars_{itc} = \alpha + \beta_1 Consolidate_c + \beta_2 year_t + \beta_3 Consolidate_c * year_t + X_i + \delta_{c2014} + \varepsilon$$

Where  $Stars_{itc}$  represents the star rating for enrollee  $i$  at time  $t$  in contract  $c$ .  $\beta_1 Consolidate_c$  is a 0/1 flag of if an enrollee's contract was consolidated between 2014 and 2015. It is equal to 1 in both years if a consolidation occurred and 0 if not.  $\beta_2 year_t$  is an indicator of year, in our case a 0/1 flag for 2015.  $\beta_3 Consolidate_c * year_t$  is the interaction between consolidation and year and is our primary instrument. If an enrollee is in a consolidated contract, in the year following consolidation, they may be exposed to a higher star rating.  $X_i$  is a vector of patient demographic characteristics.  $\delta_{c2014}$  is a fixed effect for the enrollee's contract in 2014 in order to better compare enrollees who are in similar contracts pre- and post- consolidation. We estimate these models using the program `xtivreg2` in Stata 15<sup>29</sup> and use robust standard errors.

To test whether consolidation is a strong instrument, meeting the first stage IV assumption, we check the F-statistics from the first stage. A F-statistic over 10 is considered to be a strong instrument.<sup>18</sup> We find that across our models, the F-statistics are over 1,000 for each outcome, indicating that consolidation is likely a sufficiently strong instrument. It is not possible to prove that contract consolidation is exogenous from enrollee outcomes, however it is reassuring that there are not substantial demographic differences between those who were consolidated and those who were not.

From these models, we are able to estimate the local average treatment effect (LATE) of star ratings on outcomes. In our case, this provides the treatment effects of an increased star ratings on the outcomes of enrollees who comply with the consolidation in moving to a higher rated contract.

## Appendix D: Detailed Description of Outcomes

| Outcome                                 | Source                          | External Link                                                                                                                                           | Description                                                                                                                                                                                                                                                                                                                                                                                                                                                                     | Sample Size | Additional Notes                                                                                                                                                                                                                                                                                                                                                                                                                                                                                                                                                                                                                                                                                                                                                                                                                                                                                                                                                                                                                                             |
|-----------------------------------------|---------------------------------|---------------------------------------------------------------------------------------------------------------------------------------------------------|---------------------------------------------------------------------------------------------------------------------------------------------------------------------------------------------------------------------------------------------------------------------------------------------------------------------------------------------------------------------------------------------------------------------------------------------------------------------------------|-------------|--------------------------------------------------------------------------------------------------------------------------------------------------------------------------------------------------------------------------------------------------------------------------------------------------------------------------------------------------------------------------------------------------------------------------------------------------------------------------------------------------------------------------------------------------------------------------------------------------------------------------------------------------------------------------------------------------------------------------------------------------------------------------------------------------------------------------------------------------------------------------------------------------------------------------------------------------------------------------------------------------------------------------------------------------------------|
| Plan Disenrollment or Switching         | Master Beneficiary Summary File | n/a                                                                                                                                                     | A 0/1 flag for if an enrollee disenrolled from Medicare Advantage or switched contracts within Medicare Advantage in the following year. Defined for 2014 observations based on 2015 enrollment, and for 2015 observations based on 2016 enrollment.                                                                                                                                                                                                                            | 30,104,761  | <p>For enrollees who consolidated, we do not consider them to have switched contracts if they comply with the consolidation.</p> <p>As we cannot tell someone's enrollment decision if they have died, this outcome is calculated conditional on survival through the end of the following year.</p> <p>A potential source of bias in this measurement is that consolidated enrollees in 2015, who did not disenroll at the end of 2014, may be systematically different from non-consolidated enrollees. If someone choose to stay in the program from 2014 into 2015, they may be different than enrollees who first become eligible in 2015 and have not yet had an opportunity to disenroll. We test the extent to which this issue may introduce bias in two ways. First, we found that baseline disenrollment rates between consolidated and non-consolidated groups were not substantially different. Second, we tested the differences in disenrollment in 2016, condition on continued enrollment from 2014 to 2015, and found similar results.</p> |
| 30- and 90-day unplanned readmission    | MedPAR                          | <a href="https://cmit.cms.gov/CMIT_public/ReportMeasure?measureRevisionId=609">https://cmit.cms.gov/CMIT_public/ReportMeasure?measureRevisionId=609</a> | A 0/1 flag for if an enrollee was readmitted to the hospital following a hospital discharge. Enrollees who were not hospitalized in a year do not contribute to this measure. Unplanned readmission status is based on the CMS algorithm. If an enrollee was hospitalized multiple times within a year, the readmission will only be assessed based on the first admission of the year.                                                                                         | 4,132,632   | In analyses of readmissions, there is often a competing risk of mortality. These competing risks may be best addressed by a multinomial model, however we cannot use such a model in our primary analysis due to the inclusion of fixed effects. As such, we assess readmissions unconditional on mortality.                                                                                                                                                                                                                                                                                                                                                                                                                                                                                                                                                                                                                                                                                                                                                 |
| Admission to high or low rated hospital | MedPAR and Hospital Compare     | <a href="https://www.medicare.gov/hospitalcompare/About/What-Is-HOS.html">https://www.medicare.gov/hospitalcompare/About/What-Is-HOS.html</a>           | For the purposes of this analysis, we consider a hospital to be "high quality" if they received 4+ stars from hospital compare star ratings. We consider a hospital to be "low quality" if they receive fewer than 3 stars. This measure takes the form of a 0/1 indicator separately for if an enrollee was admitted to a high or low quality hospital for their first recorded hospitalization of a year. Those who were not hospitalized were not included in this analysis. | 4,132,632   | As there are some criticisms of the hospital compare 5-star ratings, we also ran sensitivity analyses using admission to a hospital in the highest or lowest quintile of readmission rates. We found similar results to when we used star ratings.                                                                                                                                                                                                                                                                                                                                                                                                                                                                                                                                                                                                                                                                                                                                                                                                           |

|                                                    |                                            |                                                                                                                                                                                                                                 |                                                                                                                                                                                                                                                                                                                                                                                                                                                                                                                 |           |                                                                                |
|----------------------------------------------------|--------------------------------------------|---------------------------------------------------------------------------------------------------------------------------------------------------------------------------------------------------------------------------------|-----------------------------------------------------------------------------------------------------------------------------------------------------------------------------------------------------------------------------------------------------------------------------------------------------------------------------------------------------------------------------------------------------------------------------------------------------------------------------------------------------------------|-----------|--------------------------------------------------------------------------------|
| Admission to High or Low rated Nursing Home        | Minimum Data Set 3.0, Nursing Home Compare | <a href="https://www.cms.gov/medicare/provider-enrollment-and-certification/certificationandcompliance/fsqrs.html">https://www.cms.gov/medicare/provider-enrollment-and-certification/certificationandcompliance/fsqrs.html</a> | For the purposes of this analysis, we consider a nursing home to be "high quality" if they received 4+ stars from nursing home compare star ratings. We consider a nursing home to be "low quality" if they receive fewer than 3 stars. This measure takes the form of a 0/1 indicator separately for if an enrollee was admitted to a high or low quality nursing for their first recorded nursing home admission of a year. Those who were not admitted to a nursing home were not included in this analysis. | 1,342,226 |                                                                                |
| Breast Cancer Screening                            | HEDIS                                      | <a href="https://www.ncqa.org/hedis/measures/breast-cancer-screening/">https://www.ncqa.org/hedis/measures/breast-cancer-screening/</a>                                                                                         | A 0/1 indicator of whether women aged 50-74 had at least one mammogram to screen for breast cancer in the past two years.                                                                                                                                                                                                                                                                                                                                                                                       | 5,741,351 | Not all enrollees are eligible for the denominator for this measure each year. |
| Colorectal Cancer Screening                        | HEDIS                                      | <a href="https://www.ncqa.org/hedis/measures/colorectal-cancer-screening/">https://www.ncqa.org/hedis/measures/colorectal-cancer-screening/</a>                                                                                 | A 0/1 indicator of whether adults aged 50-75 had an appropriate screening for colorectal cancer with any of the following tests: annual fecal occult blood test, flexible sigmoidoscopy every 5 years, colonoscopy every 10 years, computed tomography colonography every 5 years, stool DNA test every 3 years.                                                                                                                                                                                                | 1,079,010 | Not all enrollees are eligible for the denominator for this measure each year. |
| Management of High Blood Pressure                  | HEDIS                                      | <a href="https://www.ncqa.org/hedis/measures/controlling-high-blood-pressure/">https://www.ncqa.org/hedis/measures/controlling-high-blood-pressure/</a>                                                                         | A 0/1 indicator for if adults with a diagnosis of hypertension met any of the following criteria: Adults aged 18-59 years of age whose blood pressure was <140/90 mm Hg. Adults 60-85 years of age with a diagnosis of diabetes whose blood pressure was <140/90 mm Hg. Adults 60-85 years of age without a diagnosis of diabetes whose blood pressure was <150/90 mm Hg.                                                                                                                                       | 261,479   | Not all enrollees are eligible for the denominator for this measure each year. |
| Follow-up after hospitalization for mental illness | HEDIS                                      | <a href="https://www.ncqa.org/hedis/measures/follow-up-after-hospitalization-for-mental-illness/">https://www.ncqa.org/hedis/measures/follow-up-after-hospitalization-for-mental-illness/</a>                                   | A 0/1 flag for if an enrollee who was hospitalized for the treatment of a selected mental health disorder, had an outpatient visit with a mental health practitioner within 30 days of discharge.                                                                                                                                                                                                                                                                                                               | 107,369   | Not all enrollees are eligible for the denominator for this measure each year. |
| Use of low value PSA exam                          | HEDIS                                      | <a href="https://www.ncqa.org/hedis/measures/non-recommended-psa-based-screening-in-older-men/">https://www.ncqa.org/hedis/measures/non-recommended-psa-based-screening-in-older-men/</a>                                       | A 0/1 flag for if a man over the age of 70 was screened for prostate cancer through the use of a PSA screening test.                                                                                                                                                                                                                                                                                                                                                                                            | 6,128,042 | Not all enrollees are eligible for the denominator for this measure each year. |
| Osteoporosis Management                            | HEDIS                                      | <a href="https://www.ncqa.org/hedis/measures/osteoporosis-testing-and-">https://www.ncqa.org/hedis/measures/osteoporosis-testing-and-</a>                                                                                       | A 0/1 flag for if a woman aged 65-85 who has had a fracture, has had either a bone mineral density test or a                                                                                                                                                                                                                                                                                                                                                                                                    | 190,892   | Not all enrollees are eligible for the denominator for this measure each year. |

|                                                   |       |                                                                                                                                                                                                       |                                                                                                 |            |                                                                                |
|---------------------------------------------------|-------|-------------------------------------------------------------------------------------------------------------------------------------------------------------------------------------------------------|-------------------------------------------------------------------------------------------------|------------|--------------------------------------------------------------------------------|
|                                                   |       | management-in-older-women/                                                                                                                                                                            | prescription drug to treat osteoporosis in the six months after the fracture                    |            |                                                                                |
| Poor Hba1c control                                | HEDIS | <a href="https://www.ncqa.org/hedis/measures/comprehensive-diabetes-care/">https://www.ncqa.org/hedis/measures/comprehensive-diabetes-care/</a>                                                       | A 0/1 flag for adults aged 18-75 with type 1 or 2 diabetes who had an HbA1c measurement of >9%. | 566,025    | Not all enrollees are eligible for the denominator for this measure each year. |
| Diabetes Eye Screening                            | HEDIS | <a href="https://www.ncqa.org/hedis/measures/comprehensive-diabetes-care/">https://www.ncqa.org/hedis/measures/comprehensive-diabetes-care/</a>                                                       | A 0/1 flag for adults aged 18-75 with type 1 or 2 diabetes who has had an eye exam performed.   | 558,198    | Not all enrollees are eligible for the denominator for this measure each year. |
| Access to preventative/ambulatory health services | HEDIS | <a href="https://www.ncqa.org/hedis/measures/adults-access-to-preventive-ambulatory-health-services/">https://www.ncqa.org/hedis/measures/adults-access-to-preventive-ambulatory-health-services/</a> | A 0/1 flag for if an enrollee had a ambulatory or preventive care visit during the year         | 28,487,694 |                                                                                |
| Count of Outpatient or Ambulatory Visits          | HEDIS | <a href="https://www.ncqa.org/hedis/measures/frequency-of-selected-procedures/">https://www.ncqa.org/hedis/measures/frequency-of-selected-procedures/</a>                                             | A count variable for the number of outpatient visits an enrollee had in a year                  | 33,454,558 |                                                                                |



Appendix E: Comparison of Enrollee Characteristics before and after consolidation

| Variable                          | Non-Consolidated |       |                          |                                       | Consolidated |       |                          |                                       |
|-----------------------------------|------------------|-------|--------------------------|---------------------------------------|--------------|-------|--------------------------|---------------------------------------|
|                                   | 2014             | 2015  | Difference (un-adjusted) | Difference (Adjusted for Contract FE) | 2014         | 2015  | Difference (un-adjusted) | Difference (adjusted for contract FE) |
| <b>Enrollee Characteristics</b>   |                  |       |                          |                                       |              |       |                          |                                       |
| Star Rating                       | 3.9              | 4.0   | 0.1                      | 0.1                                   | 3.4          | 4.1   | 0.7                      | 0.7                                   |
| Age                               | 71.9             | 71.9  | 0.0                      | 0.9                                   | 72.6         | 73.4  | 0.8                      | 0.8                                   |
| % Black                           | 11.4%            | 11.8% | 0.4%                     | 0.0%                                  | 10.5%        | 10.5% | 0.0%                     | 0.0%                                  |
| % Hispanic                        | 13.8%            | 14.0% | 0.2%                     | 0.1%                                  | 8.8%         | 8.9%  | 0.1%                     | 0.1%                                  |
| % Asian                           | 3.5%             | 3.6%  | 0.2%                     | 0.0%                                  | 2.7%         | 2.8%  | 0.0%                     | 0.0%                                  |
| % NA/AI                           | 0.2%             | 0.2%  | 0.0%                     | 0.0%                                  | 0.2%         | 0.2%  | 0.0%                     | 0.0%                                  |
| % Female                          | 56.4%            | 56.3% | 0.0%                     | 0.0%                                  | 57.5%        | 57.7% | 0.2%                     | 0.2%                                  |
| % Dual                            | 19.3%            | 20.5% | 1.2%                     | 0.2%                                  | 15.4%        | 15.5% | 0.1%                     | 0.3%                                  |
| % Disability                      | 13.9%            | 14.1% | 0.2%                     | -1.0%                                 | 11.6%        | 10.7% | -0.9%                    | -0.8%                                 |
| <b>Outcomes</b>                   |                  |       |                          |                                       |              |       |                          |                                       |
| % Enter High Rated Hospital       | 25.0%            | 25.4% | 0.4%                     | 0.3%                                  | 27.2%        | 28.1% | 0.9%                     | 1.0%                                  |
| % Enter Low Rated Hospital        | 30.3%            | 30.5% | 0.2%                     | 0.1%                                  | 26.8%        | 26.1% | -0.7%                    | -0.6%                                 |
| 30-Day Readmissions               | 12.6%            | 12.9% | 0.2%                     | 1.0%                                  | 11.6%        | 12.2% | 0.6%                     | 0.7%                                  |
| 90-Day Readmissions               | 19.7%            | 20.2% | 0.5%                     | 1.4%                                  | 18.3%        | 19.3% | 1.0%                     | 1.1%                                  |
| Switching/Disenrollment %         | 7.1%             | 8.0%  | 0.8%                     | 1.6%                                  | 6.6%         | 6.8%  | 0.2%                     | 0.4%                                  |
| % Enter High Rated SNF            | 50.3%            | 43.1% | -7.2%                    | -7.0%                                 | 49.7%        | 43.5% | -6.1%                    | -6.2%                                 |
| % Enter Low Rated SNF             | 25.1%            | 30.5% | 5.4%                     | 5.0%                                  | 26.7%        | 30.9% | 4.2%                     | 4.3%                                  |
| <b>HEDIS Measures</b>             |                  |       |                          |                                       |              |       |                          |                                       |
| Mental health Follow-up           | 56.2%            | 54.9% | -1.3%                    | -0.2%                                 | 54.1%        | 53.9% | -0.2%                    | 0.0%                                  |
| Colorectal Cancer Screening       | 71.6%            | 84.5% | 12.9%                    | 1.1%                                  | 61.7%        | 65.1% | 3.4%                     | 2.6%                                  |
| Breast Cancer Screening           | 77.0%            | 77.2% | 0.3%                     | 0.3%                                  | 70.5%        | 71.8% | 1.4%                     | 1.4%                                  |
| Management of Osteoporosis        | 39.5%            | 42.6% | 3.0%                     | 3.4%                                  | 41.3%        | 44.2% | 2.9%                     | 3.0%                                  |
| Management of High Blood Pressure | 69.8%            | 66.7% | -3.1%                    | -1.7%                                 | 68.5%        | 67.9% | -0.6%                    | -0.3%                                 |
| Poor HBa1c control                | 19.6%            | 20.9% | 1.3%                     | 0.1%                                  | 23.3%        | 24.8% | 1.5%                     | 1.4%                                  |
| Diabetes eye screening            | 75.5%            | 76.0% | 0.5%                     | 2.2%                                  | 68.4%        | 68.2% | -0.2%                    | -0.2%                                 |
| Use of low value PSA              | 39.6%            | 35.2% | -4.5%                    | -4.2%                                 | 40.4%        | 32.3% | -8.1%                    | -8.2%                                 |

Notes: In this table we show the differences between 2014 and 2015 characteristics and outcomes of enrollees who were and were not consolidated. The unadjusted difference column shows the crude differences between 2014 and 2015. The adjusted column estimates the difference using a simple linear model with 2014 contract fixed effects.

## Appendix F: First Stage Regression Summary Table

| Outcomes                          | First Stage |             |
|-----------------------------------|-------------|-------------|
|                                   | Coefficient | F-Statistic |
| % Enter High Rated Hospital       | 0.66        | >10000      |
| % Enter Low Rated Hospital        | 0.66        | >10000      |
| 30-Day Readmissions               | 0.66        | >10000      |
| 90-Day Readmissions               | 0.66        | >10000      |
| Disenrollment %                   | 0.66        | >10000      |
| % Enter High Rated SNF            | 0.65        | >10000      |
| % Enter Low Rated SNF             | 0.65        | >10000      |
| <b>HEDIS Measures</b>             |             |             |
| Mental health Follow-up           | 0.66        | 5126        |
| Colorectal Cancer Screening       | 0.41        | >10000      |
| Breast Cancer Screening           | 0.68        | >10000      |
| Management of Osteoporosis        | 0.63        | >10000      |
| Management of High Blood Pressure | 0.52        | 6961        |
| Poor HbA1c control                | 0.56        | >10000      |
| Diabetes eye screening            | 0.55        | 9925        |
| Use of low value PA               | 0.65        | >10000      |

Notes: The first stage coefficient is the coefficient from the consolidation in 2015 interaction term and represents the association between consolidation and star rating. Each row comes from a separate model.

## Appendix G: Sample full first stage output

| Variable              | Coefficient | Standard Error | T      | p     | 95% CI   |          |
|-----------------------|-------------|----------------|--------|-------|----------|----------|
| Consolidation in 2015 | 0.617585    | 0.000965       | 639.92 | 0     | 0.615693 | 0.619476 |
| Age                   | 0.000203    | 1.23E-05       | 16.47  | 0     | 0.000179 | 0.000227 |
| Race: Black           | -0.01054    | 0.000416       | -25.33 | 0     | -0.01135 | -0.00972 |
| Race: Hispanic        | -0.00894    | 0.0005         | -17.87 | 0     | -0.00992 | -0.00796 |
| Race: Asian           | -0.00484    | 0.000942       | -5.14  | 0     | -0.00669 | -0.003   |
| Race: na/ai           | -0.00286    | 0.002665       | -1.07  | 0.282 | -0.00809 | 0.002359 |
| Female                | 0.000307    | 0.000261       | 1.18   | 0.24  | -0.00021 | 0.000819 |
| Dual                  | -0.03092    | 0.00035        | -88.29 | 0     | -0.03161 | -0.03023 |
| Year 2015             | 0.042067    | 0.000277       | 151.9  | 0     | 0.041524 | 0.042609 |

Notes: The table above is output from the first stage when modeling entrance to a high quality hospital. The above model also includes 2014 contract fixed effects. \* denotes significance at the  $p < 0.05$  level. \*\* denotes significance at the  $p < 0.001$  level.

Appendix H: Full OLS and IV Regression Output

| VARIABLES               | Admission to High Quality Hospital |                                  | Admission to Low Quality Hospital |                                  | 30 Day Readmission               |                                  | 90 Day Readmission               |                                  | % Switch/Disenroll               |                                  | Admission to High Quality Nursing Home |                                  | Admission to Low Quality Nursing Home |                                  |
|-------------------------|------------------------------------|----------------------------------|-----------------------------------|----------------------------------|----------------------------------|----------------------------------|----------------------------------|----------------------------------|----------------------------------|----------------------------------|----------------------------------------|----------------------------------|---------------------------------------|----------------------------------|
|                         | OLS                                | IV                               | OLS                               | IV                               | OLS                              | IV                               | OLS                              | IV                               | OLS                              | IV                               | OLS                                    | IV                               | OLS                                   | IV                               |
| Star Rating             | 0.004**<br>(0.003 -<br>0.006)      | 0.008**<br>(0.003 -<br>0.012)    | -0.011**<br>(-0.012 --<br>0.009)  | -0.009**<br>(-0.014 --<br>0.004) | -0.001*<br>(-0.003 --<br>0.000)  | -0.003<br>(-0.007 --<br>0.000)   | -0.001<br>(-0.002 --<br>0.001)   | -0.005*<br>(-0.010 --<br>0.000)  | -0.005**<br>(-0.006 --<br>0.005) | -0.027**<br>(-0.028 --<br>0.026) | 0.004*<br>(0.000 -<br>0.007)           | 0.010*<br>(0.001 -<br>0.019)     | 0.004**<br>(0.001 -<br>0.007)         | -0.011*<br>(-0.020 --<br>0.003)  |
| Age                     | 0.000**<br>(0.000 -<br>0.000)      | 0.000**<br>(0.000 -<br>0.000)    | -0.001**<br>(-0.001 --<br>0.001)  | -0.001**<br>(-0.001 --<br>0.001) | 0.001**<br>(0.001 -<br>0.001)          | 0.001**<br>(0.001 -<br>0.001)    | -0.001**<br>(-0.001 --<br>0.001)      | -0.001**<br>(-0.001 --<br>0.001) |
| Race/ethnicity=black    | -0.051**<br>(-0.053 --<br>0.050)   | -0.053**<br>(-0.054 --<br>0.052) | 0.065**<br>(0.064 -<br>0.067)     | 0.069**<br>(0.068 -<br>0.070)    | 0.017**<br>(0.016 -<br>0.018)    | 0.017**<br>(0.016 -<br>0.018)    | 0.029**<br>(0.027 -<br>0.030)    | 0.029**<br>(0.027 -<br>0.030)    | -0.001**<br>(-0.002 --<br>0.001) | -0.001**<br>(-0.001 --<br>0.001) | -0.047**<br>(-0.050 --<br>0.044)       | -0.046**<br>(-0.049 --<br>0.043) | 0.050**<br>(0.048 -<br>0.053)         | 0.051**<br>(0.048 -<br>0.053)    |
| Race/ethnicity=Hispanic | -0.036**<br>(-0.038 --<br>0.034)   | -0.040**<br>(-0.042 --<br>0.039) | 0.005**<br>(0.003 -<br>0.006)     | 0.007**<br>(0.005 -<br>0.008)    | -0.007**<br>(-0.008 --<br>0.006) | -0.007**<br>(-0.009 --<br>0.006) | -0.012**<br>(-0.014 --<br>0.011) | -0.012**<br>(-0.014 --<br>0.011) | -0.017**<br>(-0.018 --<br>0.017) | -0.018**<br>(-0.018 --<br>0.018) | -0.029**<br>(-0.032 --<br>0.025)       | -0.029**<br>(-0.032 --<br>0.026) | -0.001<br>(-0.004 -<br>0.002)         | -0.002<br>(-0.005 -<br>0.001)    |
| Race/ethnicity=Asian    | 0.020**<br>(0.017 -<br>0.023)      | 0.010**<br>(0.007 -<br>0.012)    | -0.052**<br>(-0.055 --<br>0.049)  | -0.055**<br>(-0.058 --<br>0.052) | -0.015**<br>(-0.017 --<br>0.012) | -0.015**<br>(-0.017 --<br>0.013) | -0.027**<br>(-0.030 --<br>0.024) | -0.027**<br>(-0.030 --<br>0.024) | -0.015**<br>(-0.015 --<br>0.014) | -0.015**<br>(-0.015 --<br>0.014) | 0.012**<br>(0.005 -<br>0.019)          | 0.017**<br>(0.010 -<br>0.023)    | -0.042**<br>(-0.048 --<br>0.036)      | -0.049**<br>(-0.054 --<br>0.043) |
| Race/ethnicity=NA/AI    | -0.028**<br>(-0.036 --<br>0.019)   | -0.028**<br>(-0.036 --<br>0.020) | 0.035**<br>(0.027 -<br>0.044)     | 0.031**<br>(0.022 -<br>0.039)    | 0.003<br>(-0.004 -<br>0.010)     | 0.003<br>(-0.004 -<br>0.009)     | 0.012**<br>(0.004 -<br>0.020)    | 0.010*<br>(0.002 -<br>0.018)     | 0.014**<br>(0.012 -<br>0.016)    | 0.015**<br>(0.013 -<br>0.017)    | -0.031**<br>(-0.049 --<br>0.013)       | -0.032**<br>(-0.050 --<br>0.015) | 0.014<br>(-0.002 -<br>0.030)          | 0.010<br>(-0.006 -<br>0.025)     |
| Female                  | -0.000<br>(-0.001 -<br>0.000)      | -0.000<br>(-0.001 -<br>0.001)    | -0.009**<br>(-0.010 --<br>0.008)  | -0.009**<br>(-0.010 --<br>0.009) | -0.013**<br>(-0.013 --<br>0.012) | -0.013**<br>(-0.013 --<br>0.012) | -0.016**<br>(-0.017 --<br>0.015) | -0.016**<br>(-0.017 --<br>0.015) | -0.011**<br>(-0.011 --<br>0.011) | -0.011**<br>(-0.011 --<br>0.010) | 0.020**<br>(0.018 -<br>0.022)          | 0.020**<br>(0.019 -<br>0.022)    | -0.025**<br>(-0.026 --<br>0.023)      | -0.024**<br>(-0.026 --<br>0.023) |
| Dual with Medicaid      | -0.016**<br>(-0.017 --<br>0.015)   | -0.020**<br>(-0.021 --<br>0.019) | 0.021**<br>(0.019 -<br>0.022)     | 0.023**<br>(0.022 -<br>0.025)    | 0.040**<br>(0.039 -<br>0.041)    | 0.040**<br>(0.039 -<br>0.041)    | 0.067**<br>(0.066 -<br>0.068)    | 0.067**<br>(0.066 -<br>0.068)    | 0.047**<br>(0.047 -<br>0.047)    | 0.048**<br>(0.048 -<br>0.048)    | -0.061**<br>(-0.063 --<br>0.059)       | -0.063**<br>(-0.065 --<br>0.061) | 0.073**<br>(0.071 -<br>0.075)         | 0.072**<br>(0.070 -<br>0.073)    |
| 2015                    | 0.003**<br>(0.002 -<br>0.004)      | 0.002**<br>(0.001 -<br>0.003)    | 0.001**<br>(0.000 -<br>0.002)     | 0.001*<br>(0.000 -<br>0.002)     | 0.003**<br>(0.003 -<br>0.004)    | 0.003**<br>(0.003 -<br>0.004)    | 0.006**<br>(0.005 -<br>0.007)    | 0.006**<br>(0.005 -<br>0.007)    | 0.005**<br>(0.005 -<br>0.005)    | 0.007**<br>(0.007 -<br>0.007)    | -0.067**<br>(-0.069 --<br>0.066)       | -0.068**<br>(-0.070 --<br>0.066) | 0.046**<br>(0.045 -<br>0.048)         | 0.048**<br>(0.046 -<br>0.049)    |
| Observations            | 4,132,632                          | 4,132,632                        | 4,132,632                         | 4,132,632                        | 4,132,632                        | 4,132,632                        | 4,132,632                        | 4,132,632                        | 30,104,761                       | 30,104,761                       | 1,342,227                              | 1,342,227                        | 1,342,227                             | 1,342,227                        |
| R-squared               | 0.129                              | 0.003                            | 0.158                             | 0.004                            | 0.006                            | 0.003                            | 0.010                            | 0.006                            | 0.029                            | 0.006                            | 0.130                                  | 0.011                            | 0.085                                 | 0.011                            |

| VARIABLES               | Mental Health Followup        |                               | Colorectal Cancer Screening   |                               | Breast Cancer Screening       |                               | Management of Osteoporosis    |                               | Management of High Blood Pressure |                               | Poor HbA1c control            |                               | Diabetes Eye Screening        |                               | Low value PSA Exam            |                               |
|-------------------------|-------------------------------|-------------------------------|-------------------------------|-------------------------------|-------------------------------|-------------------------------|-------------------------------|-------------------------------|-----------------------------------|-------------------------------|-------------------------------|-------------------------------|-------------------------------|-------------------------------|-------------------------------|-------------------------------|
|                         | OLS                           | IV                            | OLS                           | IV                            | OLS                           | IV                            | OLS                           | IV                            | OLS                               | IV                            | OLS                           | IV                            | OLS                           | IV                            | OLS                           | IV                            |
| Star Rating             | 0.021**<br>(0.010 - 0.033)    | 0.024<br>(-0.013 - 0.060)     | 0.007*<br>(0.000 - 0.014)     | 0.036*<br>(0.008 - 0.065)     | 0.010**<br>(0.008 - 0.011)    | 0.018**<br>(0.013 - 0.022)    | 0.003<br>(-0.007 - 0.013)     | -0.006<br>(-0.033 - 0.020)    | 0.044**<br>(0.037 - 0.052)        | 0.053**<br>(0.017 - 0.089)    | -0.028**<br>(-0.033 - -0.022) | 0.013<br>(-0.013 - 0.039)     | 0.027**<br>(0.021 - 0.034)    | -0.029<br>(-0.058 - 0.000)    | -0.007**<br>(-0.009 - -0.005) | -0.066**<br>(-0.070 - -0.061) |
| Age                     | -0.004**<br>(-0.005 - -0.004) | -0.004**<br>(-0.005 - -0.004) | 0.003**<br>(0.003 - 0.003)    | 0.003**<br>(0.003 - 0.003)    | 0.000<br>(-0.000 - 0.000)     | -0.000<br>(-0.000 - 0.000)    | -0.002**<br>(-0.002 - -0.001) | -0.002**<br>(-0.002 - -0.001) | 0.002**<br>(0.001 - 0.002)        | 0.002**<br>(0.001 - 0.002)    | -0.005**<br>(-0.005 - -0.005) | -0.005**<br>(-0.005 - -0.005) | 0.005**<br>(0.005 - 0.005)    | 0.005**<br>(0.005 - 0.005)    | -0.015**<br>(-0.015 - -0.014) | -0.014**<br>(-0.015 - -0.014) |
| Race/ethnicity=black    | -0.071**<br>(-0.080 - -0.062) | -0.077**<br>(-0.085 - -0.068) | 0.016**<br>(0.014 - 0.019)    | 0.015**<br>(0.013 - 0.018)    | 0.066**<br>(0.065 - 0.067)    | 0.065**<br>(0.064 - 0.067)    | -0.010*<br>(-0.020 - -0.001)  | -0.010*<br>(-0.020 - -0.001)  | -0.080**<br>(-0.086 - -0.075)     | -0.082**<br>(-0.088 - -0.077) | 0.029**<br>(0.026 - 0.032)    | 0.029**<br>(0.026 - 0.032)    | 0.013**<br>(0.009 - 0.017)    | 0.013**<br>(0.010 - 0.017)    | -0.020**<br>(-0.021 - -0.018) | -0.019**<br>(-0.021 - -0.018) |
| Race/ethnicity=Hispanic | 0.011*<br>(0.000 - 0.023)     | 0.013*<br>(0.002 - 0.024)     | 0.011**<br>(0.009 - 0.014)    | 0.011**<br>(0.009 - 0.013)    | 0.062**<br>(0.061 - 0.064)    | 0.062**<br>(0.061 - 0.064)    | 0.025**<br>(0.016 - 0.033)    | 0.026**<br>(0.018 - 0.035)    | -0.010**<br>(-0.016 - -0.003)     | -0.014**<br>(-0.020 - -0.008) | 0.022**<br>(0.019 - 0.025)    | 0.022**<br>(0.019 - 0.025)    | 0.028**<br>(0.025 - 0.031)    | 0.032**<br>(0.029 - 0.035)    | 0.016**<br>(0.015 - 0.018)    | 0.019**<br>(0.018 - 0.021)    |
| Race/ethnicity=Asian    | 0.001<br>(-0.025 - 0.027)     | 0.001<br>(-0.024 - 0.026)     | 0.023**<br>(0.020 - 0.026)    | 0.024**<br>(0.021 - 0.026)    | 0.019**<br>(0.017 - 0.021)    | 0.021**<br>(0.019 - 0.023)    | 0.019*<br>(0.004 - 0.035)     | 0.020*<br>(0.005 - 0.035)     | 0.004<br>(-0.006 - 0.014)         | 0.001<br>(-0.009 - 0.010)     | -0.017**<br>(-0.021 - -0.013) | -0.020**<br>(-0.024 - -0.016) | 0.033**<br>(0.029 - 0.038)    | 0.038**<br>(0.034 - 0.043)    | 0.051**<br>(0.049 - 0.053)    | 0.051**<br>(0.049 - 0.053)    |
| Race/ethnicity=NA/AI    | -0.041<br>(-0.092 - 0.009)    | -0.036<br>(-0.084 - 0.013)    | -0.014<br>(-0.030 - 0.003)    | -0.014<br>(-0.030 - 0.002)    | -0.021**<br>(-0.029 - -0.013) | -0.021**<br>(-0.029 - -0.014) | -0.012<br>(-0.052 - 0.029)    | -0.012<br>(-0.052 - 0.029)    | -0.059**<br>(-0.091 - -0.028)     | -0.064**<br>(-0.095 - -0.034) | 0.065**<br>(0.048 - 0.082)    | 0.074**<br>(0.058 - 0.091)    | -0.005<br>(-0.024 - 0.014)    | -0.007<br>(-0.026 - 0.011)    | -0.043**<br>(-0.053 - -0.034) | -0.047**<br>(-0.057 - -0.038) |
| Female                  | 0.076**<br>(0.070 - 0.082)    | 0.075**<br>(0.069 - 0.081)    | 0.003**<br>(0.002 - 0.005)    | 0.003**<br>(0.001 - 0.004)    | 0.387**<br>(0.360 - 0.415)    | 0.376**<br>(0.349 - 0.403)    | 0.093<br>(-0.135 - 0.320)     | 0.108<br>(-0.113 - 0.329)     | -0.001<br>(-0.005 - 0.002)        | -0.001<br>(-0.004 - 0.003)    | -0.012**<br>(-0.014 - -0.010) | -0.012**<br>(-0.014 - -0.010) | 0.028**<br>(0.026 - 0.030)    | 0.029**<br>(0.027 - 0.031)    | -0.288**<br>(-0.318 - -0.257) | -0.284**<br>(-0.314 - -0.254) |
| Dual with Medicaid      | -0.061**<br>(-0.068 - -0.053) | -0.062**<br>(-0.069 - -0.055) | -0.034**<br>(-0.037 - -0.031) | -0.036**<br>(-0.039 - -0.033) | -0.063**<br>(-0.064 - -0.062) | -0.065**<br>(-0.066 - -0.064) | -0.054**<br>(-0.060 - -0.048) | -0.054**<br>(-0.060 - -0.048) | -0.004<br>(-0.009 - 0.002)        | -0.007*<br>(-0.013 - -0.001)  | 0.027**<br>(0.024 - 0.030)    | 0.030**<br>(0.027 - 0.033)    | -0.009**<br>(-0.012 - -0.006) | -0.011**<br>(-0.015 - -0.008) | -0.056**<br>(-0.058 - -0.055) | -0.057**<br>(-0.058 - -0.055) |
| 2015                    | -0.004<br>(-0.010 - 0.002)    | -0.004<br>(-0.011 - 0.003)    | 0.010**<br>(0.008 - 0.013)    | 0.010**<br>(0.007 - 0.012)    | 0.003**<br>(0.002 - 0.004)    | 0.003**<br>(0.002 - 0.003)    | 0.034**<br>(0.029 - 0.038)    | 0.034**<br>(0.030 - 0.039)    | -0.011**<br>(-0.014 - -0.007)     | -0.010**<br>(-0.014 - -0.007) | -0.002<br>(-0.004 - 0.000)    | -0.003*<br>(-0.005 - -0.000)  | 0.020**<br>(0.018 - 0.022)    | 0.021**<br>(0.018 - 0.023)    | -0.047**<br>(-0.047 - -0.046) | -0.041**<br>(-0.042 - -0.040) |
| Observations            | 107,377                       | 107,377                       | 1,079,016                     | 1,079,016                     | 5,741,366                     | 5,741,366                     | 190,898                       | 190,898                       | 261,478                           | 261,478                       | 566,031                       | 566,031                       | 558,204                       | 558,204                       | 6,128,045                     | 6,128,045                     |
| R-squared               | 0.094                         | 0.023                         | 0.094                         | 0.004                         | 0.038                         | 0.005                         | 0.146                         | 0.004                         | 0.060                             | 0.006                         | 0.117                         | 0.010                         | 0.065                         | 0.008                         | 0.088                         | 0.035                         |

Notes: All models include 2014 contract fixed effects.

Appendix I: Summarized OLS and Sensitivity Results

| <b>Outcome</b>                    | <b>Baseline Rate in 2014</b> | <b>Primary OLS Results (percentage point differences associated with one star increase)</b> | <b>Primary IV Results (percentage point differences associated with one star increase)</b> | <b>IV Results from in-state consolidations (percentage point differences associated with one star increase)</b> | <b>Reduced Form (percentage point difference associated with consolidation)</b> | <b>IV Results among those Dually Eligible with Medicaid (percentage point differences associated with one star increase)</b> |
|-----------------------------------|------------------------------|---------------------------------------------------------------------------------------------|--------------------------------------------------------------------------------------------|-----------------------------------------------------------------------------------------------------------------|---------------------------------------------------------------------------------|------------------------------------------------------------------------------------------------------------------------------|
| Switching/Disenrollment           | 7.3                          | -0.5**<br>(-0.6, -0.5)                                                                      | -2.7**<br>(-2.8, -2.6)                                                                     | -0.9**<br>(-1.4, -0.5)                                                                                          | -1.3**<br>(-1.3, -1.2)                                                          | 1.0*<br>(0.7, 1.2)                                                                                                           |
| Admission to 4+ Star Hospital     | 23.4                         | 0.4**<br>(0.3, 0.6)                                                                         | 0.8**<br>(0.3, 1.2)                                                                        | 0.4<br>(-1.4, 2.3)                                                                                              | 0.7**<br>(0.4, 1.0)                                                             | 0.8**<br>(0.0, 1.7)                                                                                                          |
| Admission to <3 Star Hospital     | 33                           | -1.1**<br>(-1.2, -0.9)                                                                      | -0.9**<br>(-1.4, -0.4)                                                                     | -5.7**<br>(-7.6, -3.8)                                                                                          | -0.6**<br>(-0.9, -0.3)                                                          | -0.5<br>(-1.6, 0.4)                                                                                                          |
| MedPAR 30-day Readmissions        | 17                           | -0.1*<br>(-0.3, -0.0)                                                                       | -0.3<br>(-0.7, 0.0)                                                                        | -0.5<br>(-2.1, 1.2)                                                                                             | -0.3*<br>(-0.5, -0.0)                                                           | -0.8*<br>(-1.6, -0.1)                                                                                                        |
| MedPAR 90-day Readmissions        | 19.5                         | -0.1<br>(-0.2, 0.1)                                                                         | -0.5*<br>(-1.0, -0.0)                                                                      | -0.8<br>(-2.9, 1.2)                                                                                             | -0.3*<br>(-0.6, -0.0)                                                           | -0.8<br>(-1.8, 0.1)                                                                                                          |
| Admission to 4+ Star Nursing Home | 42.4                         | 0.4*<br>(0.0, 0.7)                                                                          | 1.0*<br>(0.1, 1.9)                                                                         | 7.1**<br>(2.7, 11.4)                                                                                            | 0.9**<br>(0.3, 1.4)                                                             | 2.2**<br>(0.7, 3.7)                                                                                                          |
| Admission to <3 Star Nursing Home | 32.3                         | 0.4**<br>(0.1, 0.7)                                                                         | -1.1*<br>(-2.0, -0.3)                                                                      | -4.9*<br>(-8.9, -0.9)                                                                                           | -0.7**<br>(-1.2, -0.2)                                                          | -1.0<br>(-2.4, 0.4)                                                                                                          |
| Mental health Follow-up Visit     | 53.4                         | 2.1**<br>(1.0, 3.3)                                                                         | 2.4<br>(-1.3, 6.0)                                                                         | -3.9<br>(-15.7, 7.9)                                                                                            | 0.2<br>(-2.0, 2.5)                                                              | 0.3<br>(-1.7, 7.8)                                                                                                           |
| Colorectal Cancer Screening       | 65.1                         | 0.7*<br>(0.0, 1.4)                                                                          | 3.6*<br>(0.8, 6.5)                                                                         | 5.6<br>(-3.9, 15.0)                                                                                             | 1.5*<br>(0.2, 2.8)                                                              | 3.5<br>(-4.0, 10.9)                                                                                                          |
| Breast Cancer Screening           | 72.3                         | 1.0**<br>(0.8, 1.1)                                                                         | 1.8**<br>(1.3, 2.2)                                                                        | 0.7<br>(-1.1, 2.5)                                                                                              | 1.2**<br>(0.9, 1.5)                                                             | 2.5**<br>(1.6, 3.5)                                                                                                          |
| Management of Osteoporosis        | 39.8                         | 0.3<br>(-0.7, 1.3)                                                                          | -0.6<br>(-3.3, 2.0)                                                                        | -6.4<br>(-19.0, 6.2)                                                                                            | -0.5<br>(-2.2, 1.1)                                                             | 0.5<br>(-4.1, 5.2)                                                                                                           |
| Management of High Blood Pressure | 64.3                         | 4.4**<br>(3.7, 5.2)                                                                         | 5.3**<br>(1.7, 8.9)                                                                        | 1.4<br>(-8.1, 10.9)                                                                                             | 1.4<br>(-0.1, 3.0)                                                              | 8.2<br>(-0.6, 17.1)                                                                                                          |
| Poor HbA1c Control                | 28.1                         | -2.8**<br>(-3.3, -2.2)                                                                      | 1.3<br>(-1.3, 3.9)                                                                         | -2.0<br>(-6.7, 2.6)                                                                                             | 1.1<br>(-0.1, 2.4)                                                              | 3.2<br>(-2.1, 8.4)                                                                                                           |
| Diabetes Eye Screenings           | 69.1                         | 2.7**<br>(2.1, 3.4)                                                                         | -2.9<br>(-5.8, 0.0)                                                                        | -0.1<br>(-5.4, 5.2)                                                                                             | -2.2**<br>(-3.6, -0.8)                                                          | -4.6<br>(-9.9, 0.1)                                                                                                          |
| Use of low value PSA exam         | 37.1                         | -0.7**<br>(-0.9, -0.5)                                                                      | -6.6**<br>(-7.0, -6.1)                                                                     | -12.0**<br>(-14.7, -9.4)                                                                                        | -3.9**<br>(-4.2, -3.7)                                                          | -3.4**<br>(-4.6, -2.1)                                                                                                       |
| Any Primary Care Visit            | 86.1                         | 0.3**<br>(0.3, 0.3)                                                                         | 0.5**<br>(0.4, 0.6)                                                                        | -1.0<br>(-1.7, 0.4)                                                                                             | 0.2**<br>(0.1, 0.3)                                                             | 0.0<br>(-0.2, 0.2)                                                                                                           |
| Count of Outpatient Visits        | 8.4                          | 0.9**<br>(0.8, 1.0)                                                                         | 0.8*<br>(0.8, 0.8)                                                                         | 0.7**<br>(0.5, 0.8)                                                                                             | 0.1**<br>(0.0, 0.1)                                                             | 0.1*<br>(0.0, 0.2)                                                                                                           |

Notes: All results come from models adjusting for age, gender, race/ethnicity, dual eligibility, reason for entitlement and contract fixed effects. The first results column are the OLS results for the primary model specification. The second results column are the primary IV results. The third column restricts the consolidated contracts only to those that were consolidated in the same state as defined by CMS service area files. Enrollees who are in contracts consolidated nationally are excluded. The fourth results column are from the reduced form model which estimates the association between being consolidated and each of the outcomes of interest.
